# Supplementary material
Source: HighWire-hosted journal article supplement (http://www.ajnr.org/highwire/filestream/98139/field_highwire_adjunct_files/0/0137.pdf)
Supplement: 0137.pdf [file 0137.pdf]

**On-line/Supplementary Table 1: IWK Health Centre vs BC Children's Hospital Variables**

|                               | IWK Health Centre<br>n (%) | BC Children's<br>Hospital<br>n (%) | <i>P</i> |
|-------------------------------|----------------------------|------------------------------------|----------|
| <b>Age at diagnosis (yrs)</b> |                            |                                    | 0.49     |
| Median (IQR)                  | 7.3 (2.6-12.3)*            | 5.3 (2.3-10.9)*                    |          |
| <b>Sex</b>                    |                            |                                    | 0.90     |
| Male                          | 14 (45)                    | 17 (44)                            |          |
| Female                        | 17 (55)                    | 22 (56)                            |          |
| <b>Progression of Disease</b> |                            |                                    | 0.53     |
| Yes                           | 19 (61)                    | 21 (54)                            |          |
| No                            | 12 (39)                    | 18 (57)                            |          |
| <b>Tumor Location</b>         |                            |                                    | 0.79     |
| Brainstem                     | 2 (7)                      | 2 (5)                              |          |
| Cerebral Hemisphere           | 12 (39)                    | 17 (44)                            |          |
| OPHG                          | 6 (19)                     | 8 (20)                             |          |
| Posterior Fossa               | 11 (35)                    | 10 (26)                            |          |
| Spinal Cord                   | 0 (0)                      | 2 (5)                              |          |
| <b>Tumor Mutation Status</b>  |                            |                                    | 0.088    |
| V600E                         | 12 (39)                    | 7 (18)                             |          |
| <i>KIAA1549:BRAF</i> Fusion   | 13 (42)                    | 17 (44)                            |          |
| Wild-type/Other               | 6 (19)                     | 15 (38)                            |          |

\*=mean and IQR

**Abbreviations:** IQR, interquartile range; OPHG, Optic pathway/hypothalamic glioma

Univariate analyses were used to compare data from the two hospitals.

**On-line/Supplementary Table 2: Univariate Analysis of Imaging Characteristics by Molecular Group**

|                                                                          | <i>KIAA1549-<br/>BRAF<br/>Fusion<br/>n (%)</i> | <i>BRAF<br/>V600E<br/>n (%)</i> | <i>Wild<br/>Type/Other<br/>s<br/>n (%)</i> | <i>P<sub>1</sub><br/><br/>(Fusion vs<br/>V600E vs<br/>WT)</i> | <i>P<sub>2</sub><br/><br/>(Fusion vs<br/>V600E)</i> |
|--------------------------------------------------------------------------|------------------------------------------------|---------------------------------|--------------------------------------------|---------------------------------------------------------------|-----------------------------------------------------|
| <b>Product of perpendicular diameters (Trans and AP; mm<sup>2</sup>)</b> |                                                |                                 |                                            | 0.0045                                                        | 0.0965                                              |
| Mean                                                                     | 2504<br>(1553)*                                | 1989<br>(2041)*                 | 1163<br>(1039)*                            |                                                               |                                                     |
| <b>Presence of Cysts</b>                                                 |                                                |                                 |                                            | 0.1043                                                        | 0.0945                                              |
| Yes                                                                      | 25 (83)                                        | 11 (58)                         | 13 (62)                                    |                                                               |                                                     |
| No                                                                       | 5 (17)                                         | 8 (42)                          | 8 (38)                                     |                                                               |                                                     |
| <b>Peritumoral Vasogenic Oedema</b>                                      |                                                |                                 |                                            | 0.2272                                                        | 0.1608                                              |
| No edema                                                                 | 9 (30)                                         | 5 (26)                          | 8 (38)                                     |                                                               |                                                     |
| Mild                                                                     | 16 (53)                                        | 6 (32)                          | 6 (29)                                     |                                                               |                                                     |
| Moderate                                                                 | 5 (17)                                         | 8 (42)                          | 6 (29)                                     |                                                               |                                                     |
| Massive                                                                  | 0 (0)                                          | 0 (0)                           | 1 (5)                                      |                                                               |                                                     |
| <b>Mass Effect</b>                                                       |                                                |                                 |                                            | 0.0022                                                        | 0.0053                                              |
| No mass effect                                                           | 0 (0)                                          | 2 (11)                          | 3 (14)                                     |                                                               |                                                     |
| Mild                                                                     | 2 (7)                                          | 7 (37)                          | 9 (43)                                     |                                                               |                                                     |
| Moderate                                                                 | 18 (60)                                        | 8 (42)                          | 7 (33)                                     |                                                               |                                                     |
| Massive                                                                  | 10 (33)                                        | 2 (11)                          | 2 (10)                                     |                                                               |                                                     |
| <b>Diffusion Restriction</b>                                             |                                                |                                 |                                            | 0.0042                                                        | 0.0183                                              |
| Yes                                                                      | 0 (0)                                          | 4 (21)                          | 0 (0)                                      |                                                               |                                                     |
| No                                                                       | 30 (100)                                       | 15 (79)                         | 21 (100)                                   |                                                               |                                                     |
| <b>ADC Ratio</b>                                                         |                                                |                                 |                                            | 0.0030                                                        | 0.0003                                              |
| Mean                                                                     | 3.90 ±<br>0.59*                                | 2.01 ±<br>0.75*                 | 4.59 ±<br>2.09*                            |                                                               |                                                     |
| <b>Degree of Enhancement</b>                                             |                                                |                                 |                                            | <0.0001                                                       | 0.0036                                              |
| Moderate                                                                 | 2 (7)                                          | 4 (21)                          | 2 (10)                                     |                                                               |                                                     |
| Diffuse                                                                  | 26 (87)                                        | 8 (42)                          | 6 (29)                                     |                                                               |                                                     |
| None or Minimal                                                          | 2 (7)                                          | 7 (37)                          | 13 (62)                                    |                                                               |                                                     |
| <b>Signals on T2W1 and FLAIR</b>                                         |                                                |                                 |                                            | 0.4785                                                        | 0.3629                                              |
| High                                                                     | 28 (93)                                        | 16 (84)                         | 19 (95)                                    |                                                               |                                                     |
| Isointense                                                               | 2 (7)                                          | 3 (16)                          | 1 (5)                                      |                                                               |                                                     |
| <b>T1 Signal</b>                                                         |                                                |                                 |                                            | 0.0023                                                        | 0.0080                                              |
| Mainly Hypointense                                                       | 28 (93)                                        | 11 (58)                         | 19 (90)                                    |                                                               |                                                     |
| Mainly Isointense                                                        | 2 (7)                                          | 8 (42)                          | 1 (5)                                      |                                                               |                                                     |
| <b>Hemorrhage/Calcification</b>                                          |                                                |                                 |                                            | 0.7016                                                        | 0.6359                                              |
| Yes                                                                      | 2 (7)                                          | 2 (11)                          | 3 (14)                                     |                                                               |                                                     |
| No                                                                       | 28 (93)                                        | 17 (89)                         | 18 (86)                                    |                                                               |                                                     |
| <b>Hydrocephalus</b>                                                     |                                                |                                 |                                            | <0.0001                                                       | 0.0002                                              |
| Yes                                                                      | 25 (83)                                        | 5 (26)                          | 6 (29)                                     |                                                               |                                                     |

|                        |          |         |         |        |        |
|------------------------|----------|---------|---------|--------|--------|
| No                     | 5 (17)   | 14 (74) | 15 (71) |        |        |
| <b>Margin</b>          |          |         |         | 0.0002 | 0.0001 |
| Infiltrative           | 4 (13)   | 13 (68) | 10 (48) |        |        |
| Well defined           | 26 (87)  | 6 (32)  | 11 (52) |        |        |
| <b>MR Spectroscopy</b> |          |         |         |        |        |
| <b>Cho/Cr</b>          |          |         |         | 0.3714 | 0.1373 |
| High                   | 11 (100) | 5 (71)  | 3 (100) |        |        |
| Low                    | 0 (0)    | 1 (14)  | 0 (0)   |        |        |
| Normal                 | 0 (0)    | 1 (14)  | 0 (0)   |        |        |
| <b>Cho/NAA</b>         |          |         |         | 0.2143 | 0.1373 |
| High                   | 11 (100) | 5 (71)  | 3 (100) |        |        |
| Low                    | 0 (0)    | 2 (29)  | 0 (0)   |        |        |
| <b>Lac/Cr</b>          |          |         |         | 0.0194 | 0.1373 |
| High                   | 11 (100) | 5 (71)  | 1 (33)  |        |        |
| No lactate             | 0 (0)    | 2 (29)  | 2 (67)  |        |        |

\*=mean and standard deviation

**Abbreviations:** Trans, transverse; AP, anterior-posterior; Cho/Cr, Choline/Creatine; Cho/NAA, Choline/N-acetylaspartate; Lac/Cr, Lactate/Creatine

**Supplementary material (Figure):** This figure displays images of each molecular group within the similar anatomical location for comparative purposes.

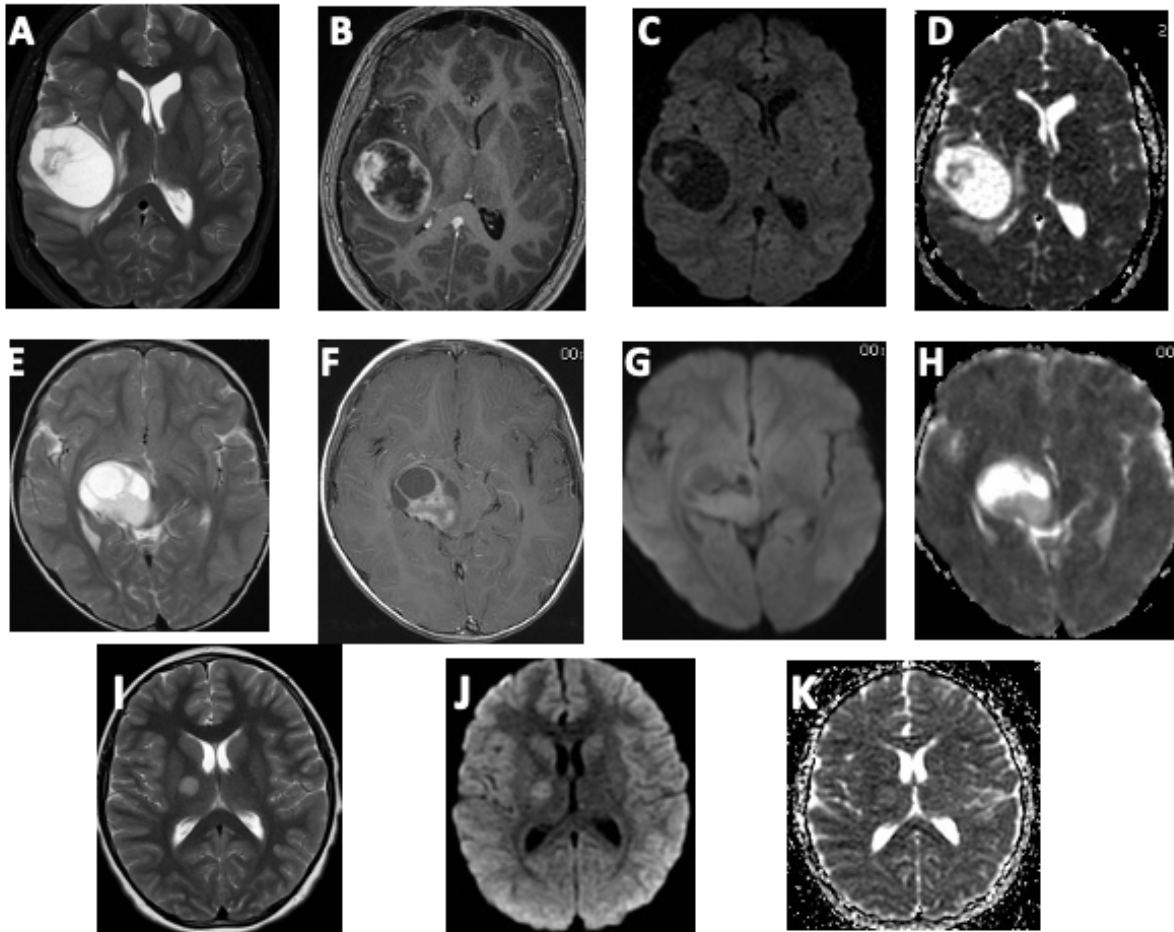

**First row (A-D):** Right temporal lobe BRAF V600E mutated tumor showing complex cystic/solid component on T2WI (Panel A), rim enhancement (Panel B) and diffusion restriction (Panel C and D). There is mild mass effect with moderate peritumoral edema.

**Second row (E-H):** Right thalamic centred BRAF fusion tumor lesion showing complex cystic-solid tumor on T2WI (Panel E), moderate to diffuse enhancement within the solid component (Panel F), without definite diffusion restriction (Panel G and H). The mass shows significant mass effect against surrounding structure with a leftward deviation of midline (Panel E, F, G and H).

**Third row (I-K):** Right thalamic Wild-Type tumor showing solid appearance on T2WI (Panel I), no diffusion restriction (Panel J and K). No mass effect or surrounding edema is seen (Panel I, J and K). The post-contrast T1WI was not obtained for this patient.
